# Supplementary material for: Identification of MicroRNA 395a in 24-Epibrassinolide-Regulated Root Growth of Arabidopsis thaliana Using MicroRNA Arrays
Source: PubMed Central journal article supplement (PMC3742243; doi:10.3390/ijms140714270), 2013-07-09
Supplement: ijms-14-14270-s001.pdf [file ijms-14-14270-s001.pdf]

## Supporting Information

**Figure S1.** EBR-induced BRU6 and SAURAC-1 gene expression. Light-grown Col-0 seedlings were treated with 10 nM EBR and transcript abundance was analyzed by RT-PCR. Gene expression levels of (A) BRU6 and SAURAC-1; and (B) differential expression of each gene after EBR treatment for the indicated durations were compared to the DMSO-treated control and represented as expression ratios.

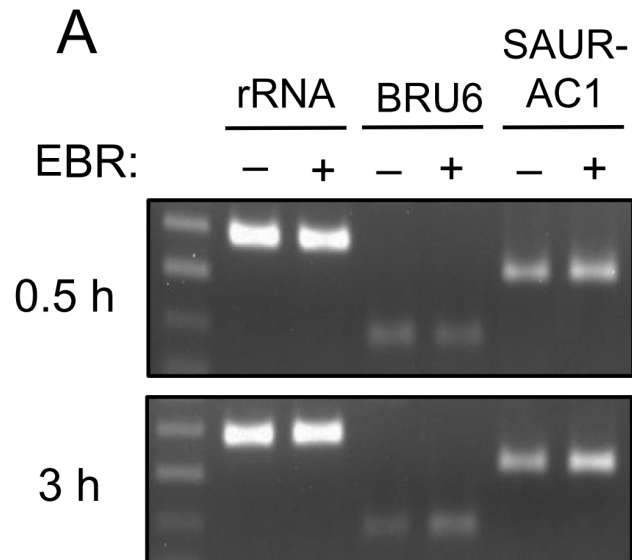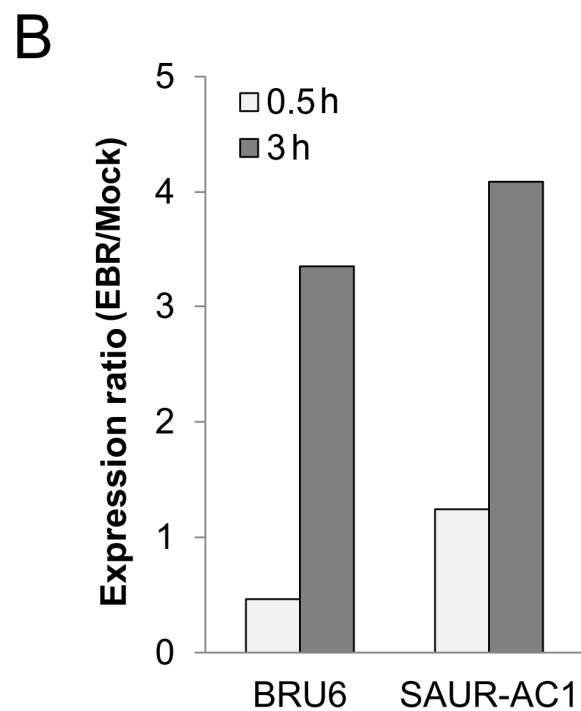

**Figure S2.** Signal scatter plot of sample duplicates. Seedlings were treated for (A) 30 or (B) 180 min with EBR or mock solution (DMSO). Each dot represents one miRNA. No differences between duplicates were found.

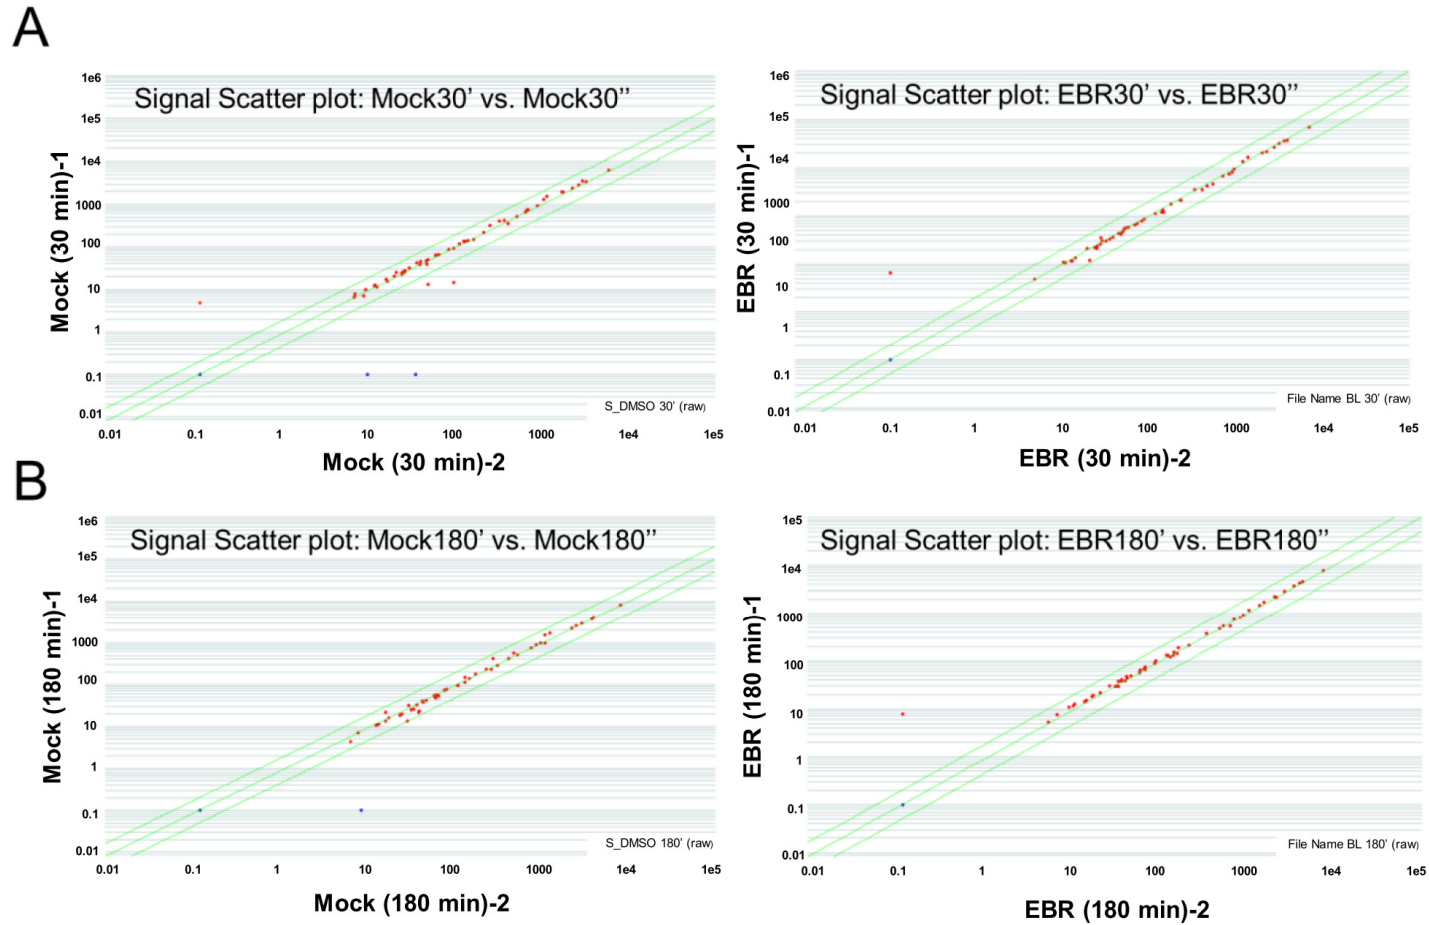

**Figure S3.** miR395a was expressed in chloroplasts around leaf veins. In miR395a promoter::GUS plants, leaf vein chloroplasts appearing as green spots show the expression pattern of miR395a.

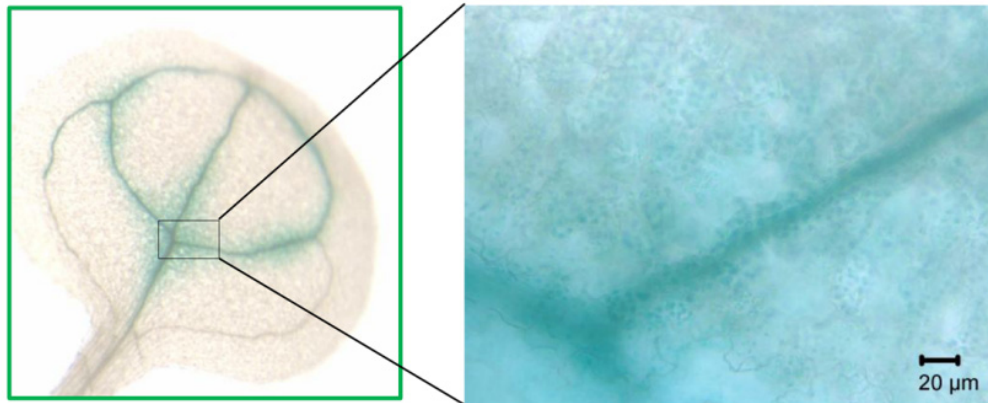

**Table S1.** Targets predicted by miRU database <sup>1</sup>.

| ID            | Target site alignment                                     | Site      | Score | Mismatch |
|---------------|-----------------------------------------------------------|-----------|-------|----------|
| Query (3'-5') | cucaaggggguuugugaaguc                                     |           |       |          |
| At5g43780.1   | gaguucc <u>cc</u> aaacacuca <u>u</u>                      | 395–415   | 0.5   | 2        |
| At2g28780.1   | gagu <u>g</u> cc <u>u</u> ccaaacacuucag                   | 1119–1139 | 1.5   | 2        |
| At5g10180.1   | aaguuc <u>u</u> ccaaacacuca <u>a</u>                      | 125–145   | 1.5   | 3        |
| At3g22890.1   | gaguucc <u>u</u> ccaaac <u>u</u> cuca <u>u</u>            | 442–462   | 2     | 3        |
| At4g14680.1   | gaguucc <u>u</u> ccaaac <u>u</u> cuca <u>u</u>            | 377–397   | 2     | 3        |
| At5g13630.1   | gagu <u>u</u> u <u>u</u> cucaaac <u>g</u> cuucag          | 3567–3587 | 2     | 4        |
| At4g23840.1   | g <u>a</u> cu <u>u</u> cc <u>u</u> caaa <u>a</u> acuucag  | 886–906   | 2.5   | 3        |
| At2g19540.1   | gagu <u>u</u> cc <u>u</u> ca <u>c</u> acacu <u>u</u> au   | 280–300   | 2.5   | 5        |
| At4g23990.1   | cagu <u>u</u> cc <u>u</u> caaa <u>u</u> uca <u>a</u>      | 1030–1050 | 2.5   | 5        |
| At2g21230.1   | aagu <u>u</u> cc <u>u</u> caaa <u>c</u> ca <u>a</u> uucag | 1096–1116 | 3     | 4        |
| At2g21230.2   | aagu <u>u</u> cc <u>u</u> caaa <u>c</u> ca <u>a</u> uucag | 1096–1116 | 3     | 4        |
| At3g13070.1   | gaguuc <u>u</u> cu <u>u</u> aaacacu <u>c</u> ca <u>a</u>  | 144–164   | 3     | 5        |
| At3g54790.1   | ag <u>g</u> u <u>u</u> cc <u>a</u> ca <u>g</u> agacuucag  | 3730–3750 | 3     | 5        |
| At3g57300.1   | aagu <u>g</u> cu <u>u</u> cc <u>a</u> ga <u>a</u> acuucag | 1472–1492 | 3     | 5        |
| At5g05170.1   | cagu <u>a</u> cc <u>u</u> caaa <u>a</u> gcuucag           | 3001–3021 | 3     | 5        |

<sup>1</sup> <http://bioinfo3.noble.org/miRNA/miRU.htm>.

**Table S2.** Targets predicted by WMD3 database <sup>2</sup>.

| The potential targets of miR395a |           |           |
|----------------------------------|-----------|-----------|
| AT1G50930                        | AT2G28780 | AT3G09220 |
| AT3G22890                        | AT4G14680 | AT4G23840 |
| AT4G23990                        | AT5G13630 | AT5G43780 |

<sup>2</sup> The website of WMD3: <http://wmd3.weigelworld.org/cgi-bin/webapp.cgi>.

**Table S3.** Targets predicted by psRNATarget database <sup>3</sup>.

| miRNA accession | Target accession | Expection | Alignment                                                                  | Target description                                                                                                                                                                                                                                                                           |
|-----------------|------------------|-----------|----------------------------------------------------------------------------|----------------------------------------------------------------------------------------------------------------------------------------------------------------------------------------------------------------------------------------------------------------------------------------------|
| submitted-miRNA | AT2G28780.1      | 1.5       | miRNA 21 CUCAAGGGGGUUUGUGAAGUC 1<br>Target 1119 GAGUGCCUCCAAACACUUCAG 1139 | Symbols: similar to unknown protein [Arabidopsis thaliana] (TAIR:AT3G09450.1), similar to P-type trefoil [Medicago truncatula] (GB:ABD32899.1); chr2:12347111-12350498 REVERSE                                                                                                               |
| submitted-miRNA | AT5G10180.1      | 1.5       | miRNA 21 UCAAGGGGGUUUGUGAAGUC 2<br>Target 126 AGUUCUCCCAAACACUUCAA 145     | Symbols: SULTR2, AST68 (Sulfate transporter 2.1); chr5:3193145-3197121 FORWARD                                                                                                                                                                                                               |
| submitted-miRNA | AT5G43780.1      | 1.5       | miRNA 21 CUCAAGGGGGUUUGUGAAGUC 1<br>Target 395 GAGUUCUCCAAACACUUCAU 415    | Symbols: APS4; chr5:17606621-17608762 REVERSE                                                                                                                                                                                                                                                |
| submitted-miRNA | AT1G50930.1      | 2         | miRNA 21 CUCAAGGGGGUUUGUGAAGUC 1<br>Target 42 GAAUUCUCCCAAACACUUCAA 62     | Symbols: similar to unknown protein [Arabidopsis thaliana] (TAIR:AT3G20557.1), similar to conserved hypothetical protein [Medicago truncatula] (GB:ABE91163.1), contains domain UNCHARACTERIZED (PTHR23140:SF6); contains domain UNCHARACTERIZED (PTHR23140); chr1:18880505-18881512 FORWARD |
| itted-miRNA     | AT5G13630.1      | 2         | miRNA 21 CUCAAGGGGGUUUGUGAAGUC 1<br>Target 3567 GAGUUUUCUCAACGCUUCAG 3587  | Symbols: CCH, CHLH, CCH1, GUN5 (GENOMES UNCOUPLED 5); chr5:4387337-4392230 REVERSE                                                                                                                                                                                                           |
| submitted-miRNA | AT5G13630.2      | 2         | miRNA 21 CUCAAGGGGGUUUGUGAAGUC 1<br>Target 3567 GAGUUUUCUCAACGCUUCAG 3587  | Symbols: CCH, CHLH, CCH1, GUN5 (GENOMES UNCOUPLED 5); chr5:4387337-4392230 REVERSE                                                                                                                                                                                                           |
| submitted-miRNA | AT1G69792.1      | 2.5       | miRNA 21 CUCAAGGGGGUUUGUGAAGUC 1<br>Target 11 GAGUUCUCCUGAACACUUCAU 31     | Symbols: MIR395D; chr1:26273642-26273741 REVERSE                                                                                                                                                                                                                                             |

Table 1. Cont.

| miRNA accession | Target accession | Expection | Alignment                                                               | Target description                                                                                                                                                                              |
|-----------------|------------------|-----------|-------------------------------------------------------------------------|-------------------------------------------------------------------------------------------------------------------------------------------------------------------------------------------------|
| submitted-miRNA | AT1G69797.1      | 2.5       | miRNA 21 CUCAAGGGGGUUGUGAAGUC 1<br>Target 11 GAGUUCCCUAAAACGCUUCAU 31   | Symbols: MIR395F;<br>chr1:26277521-26277632 FORWARD                                                                                                                                             |
| submitted-miRNA | AT4G23990.1      | 2.5       | miRNA 21 UCAAGGGGGUUGUGAAGUC 2<br>Target 1064 AGUUUCCUCAACAUAUUCAA 1083 | Symbols: CSLG3, ATCSLG3 (Cellulose synthase-like G3), transferase, transferring glycosyl groups;<br>chr4:12456501-12460763 FORWARD                                                              |
| submitted-miRNA | AT1G26973.1      | 3         | miRNA 21 CUCAAGGGGGUUGUGAAGUC 1<br>Target 11 GAGUUCCUCUGAGCACUUCAU 31   | Symbols: MIR395A;<br>chr1:9363183-9363275 REVERSE                                                                                                                                               |
| submitted-miRNA | AT1G69795.1      | 3         | miRNA 21 CUCAAGGGGGUUGUGAAGUC 1<br>Target 11 GAGUUCCUCUGAGCACUUCAU 31   | Symbols: MIR395E;<br>chr1:26276439-26276533 REVERSE                                                                                                                                             |
| submitted-miRNA | AT2G17787.1      | 3         | miRNA 21 UCAAGGGGGUUGUGAAGUC 2<br>Target 1342 AGUUUCCCAAGUAUUUUAG 1361  | Symbols: similar to unknown protein [Arabidopsis thaliana] (TAIR:AT4G35940.1), similar to conserved hypothetical protein [Medicago truncatula] (GB:ABE79676.1);<br>chr2:7738157-7740101 FORWARD |
| submitted-miRNA | AT2G20463.1      | 3         | miRNA 21 CUCAAGGGGGUUGUGAAGUC 1<br>Target 5 GAUUUCCCCAAAACUUUAG 25      | Symbols: Encodes a defensin-like (DEFL) family protein;<br>chr2:8830814-8831203 REVERSE                                                                                                         |
| submitted-miRNA | AT3G22890.1      | 3         | miRNA 21 CUCAAGGGGGUUGUGAAGUC 1<br>Target 442 GAGUUCCUCCAAACUCUUCAU 462 | Symbols: APS1 (ATP sulfurylase 3);<br>chr3:8112730-8114997 FORWARD                                                                                                                              |
| submitted-miRNA | AT4G14680.1      | 3         | miRNA 21 CUCAAGGGGGUUGUGAAGUC 1<br>Target 414 GAGUUCCUCCAAACUCUUCAU 434 | Symbols: APS3 (ATP sulfurylase 2), sulfate adenylyltransferase (ATP);<br>chr4:8413283-8415386 REVERSE                                                                                           |

<sup>3</sup> The website of psRNATarget: <http://www.plantgrn.org/psRNATarget/>.

**Table S4.** Primer list designed for gene expression.

| <b>Gene ID</b> | <b>Primer name</b> | <b>F or R</b> | <b>Primer sequence (5'→3')</b> |
|----------------|--------------------|---------------|--------------------------------|
| AT3G41768      | A. tha: rRNA-1     | forward       | CGGCTACCACATCCAAGGAA           |
|                | A. tha: rRNA-2     | reverse       | GCTGGAATTACCGCGGCT             |
| AT4G37390      | A. tha: BRU6-1     | forward       | CGTATATCCAACGGCGATTGT          |
|                | A. tha: BRU6-2     | reverse       | CCAGCAGATGTTCTGAGCTT           |
| AT4G38850      | A. tha: SAUR-AC1-1 | forward       | GAGGATTCATGGCGGTCTATG          |
|                | A. tha: SAUR-AC1-2 | reverse       | GTTAAGCCGCCATTGGAT             |
| AT5G43780      | A.tha: APS4-1      | forward       | GCTTAGCATGGCACCAGGACTT         |
|                | A.tha: APS4-2      | reverse       | GCCAACCCACGCATCTTGTT           |
| AT5G13630      | A.tha: GUN5-1      | forward       | GGCTGGACGCAAGAACAAAG           |
|                | A.tha: GUN5-2      | reverse       | GCACTCCATCCCACAGTGTTG          |
| AT2G21230      | A.tha: F7O24.5-1   | forward       | AACTCCGCGATGCTCTGTCAGAGA       |
|                | A.tha: F7O24.5-2   | reverse       | GTTCGGCTCCCCTATCACCAGTTT       |
| AT4G33430      | A.tha: BAK1-1      | forward       | CTGGACAGCTCGTAATGCAA           |
|                | A.tha: BAK1-2      | reverse       | GGCCGAGAGTTGATGGAATA           |
| AT1G19350      | A.tha: BES1-1      | forward       | CTACCCGTTTTATGCGGTGT           |
|                | A.tha: BES1-2      | reverse       | TTGCTGCTGTGTTTGGAGAC           |
| AT1G75080      | A.tha: BZR1-1      | forward       | TCATCATTCCCGAGTCCTTC           |
|                | A.tha: BZR1-2      | reverse       | AATGGCCATGGATTGCTTAG           |
| AT4G39400      | A.tha: BRI1-1      | forward       | GCAACTGTTCTGAGCTGGTTTCGC       |
|                | A.tha: BRI1-2      | reverse       | TGAGCTCCTGAGGGATCTCTCT         |
